# Supplementary material
Source: Springer Nature journal article supplement (https://www.springermedizin.de/resource/supplementary/12884_2012_619_MOESM1_ESM.pdf/9457884)

### Stage 1: Development

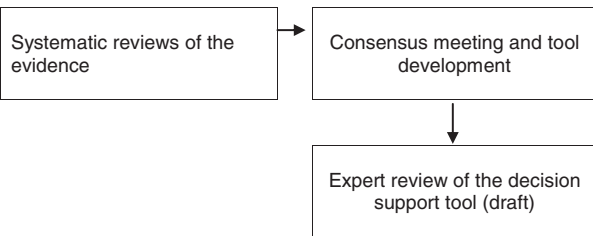

### Stage 2: In country pre-test

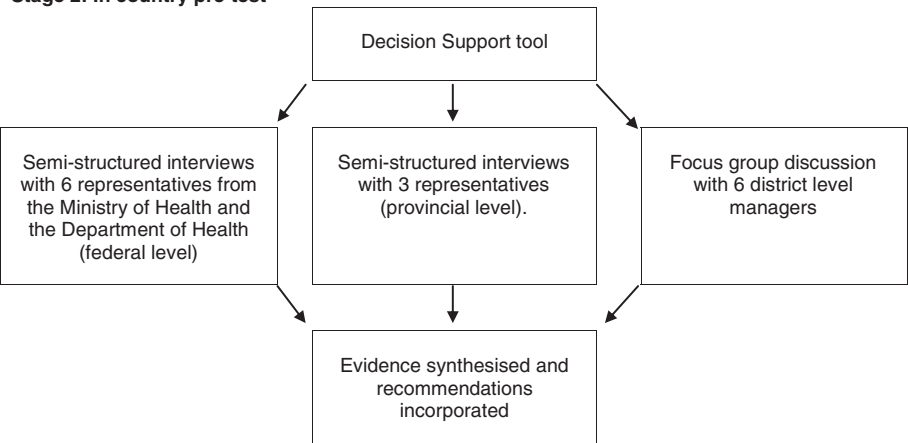

### Stage 3: Expert review

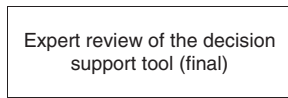

Supplement: MOESM1 [file 9457884]
